# Supplementary material
Source: PubMed Central journal article supplement (PMC5076805)
Supplement: 10.1074_M116.742163_jbc.M116.742163-1.pdf [file 10.1074_M116.742163_jbc.M116.742163-1.pdf]

**Structural Basis for Interactions Between Contactin Family Members and Protein Tyrosine Phosphatase Receptor Type G in Neural Tissues**

**Roman M. Nikolaienko, Michal Hammel, Véronique Dubreuil, Rana Zalmai, David R. Hall, Nurjahan Mehzabeen, Sebastian J. Karuppan, Sheila Harroch, Salvatore L. Stella and Samuel Bouyain**

**SUPPLEMENTARY TABLES AND FIGURES**

**Table S1.** Curve-fitting parameters obtained for each AlphaScreen bead-based competition assay.

| Inhibitor | Immobilized proteins  | IC <sub>50</sub> (nM) | R <sup>2</sup> | Signal/Noise | Points analyzed | Outliers | 95% confidence interval |
|-----------|-----------------------|-----------------------|----------------|--------------|-----------------|----------|-------------------------|
| PTPRZ(CA) | PTPRZ(CA)<br>CNTN1-Fc | 353                   | 0.99           | 1051         | 20              | 0        | 283 to 441 nM           |
| PTPRZ(CA) | PTPRZ(CA)<br>CNTN1-Fc | 316                   | 0.99           | 1307         | 19              | 0        | 242 to 413 nM           |
| PTPRZ(CA) | PTPRZ(CA)<br>CNTN1-Fc | 328                   | 0.98           | 417          | 19              | 0        | 224 to 481 nM           |
| PTPRZ(CA) | PTPRZ(CA)<br>CNTN1-Fc | 332                   | 0.93           | 445          | 17              | 2        | 157 to 705 nM           |
| PTPRG(CA) | PTPRG(CA)<br>CNTN3-Fc | 306                   | 0.98           | 994          | 18              | 1        | 224 to 418 nM           |
| PTPRG(CA) | PTPRG(CA)<br>CNTN3-Fc | 437                   | 0.98           | 997          | 19              | 0        | 324 to 589 nM           |
| PTPRG(CA) | PTPRG(CA)<br>CNTN3-Fc | 465                   | 0.99           | 1019         | 19              | 0        | 372 to 580 nM           |
| PTPRG(CA) | PTPRG(CA)<br>CNTN3-Fc | 418                   | 0.99           | 1206         | 18              | 1        | 365 to 479 nM           |
| PTPRG(CA) | PTPRG(CA)<br>CNTN3-Fc | 564                   | 0.98           | 932          | 19              | 0        | 408 to 780 nM           |
| PTPRG(CA) | PTPRG(CA)<br>CNTN3-Fc | 412                   | 0.99           | 780          | 19              | 0        | 315 to 538 nM           |
| PTPRG(CA) | PTPRG(CA)<br>CNTN3-Fc | 397                   | 0.98           | 621          | 19              | 0        | 282 to 559 nM           |
| PTPRG(CA) | PTPRG(CA)<br>CNTN4-Fc | 146                   | 0.98           | 303          | 19              | 0        | 103 to 205 nM           |
| PTPRG(CA) | PTPRG(CA)<br>CNTN4-Fc | 192                   | 0.98           | 364          | 19              | 0        | 142 to 259 nM           |
| PTPRG(CA) | PTPRG(CA)<br>CNTN4-Fc | 207                   | 0.99           | 605          | 19              | 0        | 173 to 248 nM           |
| PTPRG(CA) | PTPRG(CA)<br>CNTN4-Fc | 235                   | 0.99           | 579          | 19              | 0        | 193 to 287 nM           |
| PTPRG(CA) | PTPRG(CA)<br>CNTN4-Fc | 153                   | 0.96           | 303          | 19              | 0        | 92 to 254 nM            |
| PTPRG(CA) | PTPRG(CA)<br>CNTN4-Fc | 236                   | 0.99           | 729          | 17              | 2        | 202 to 274 nM           |
| PTPRG(CA) | PTPRG(CA)<br>CNTN4-Fc | 297                   | 0.99           | 460          | 19              | 0        | 239 to 367 nM           |
| PTPRG(CA) | PTPRG(CA)<br>CNTN4-Fc | 343                   | 0.98           | 183          | 19              | 0        | 261 to 451 nM           |
| PTPRG(CA) | PTPRG(CA)<br>CNTN4-Fc | 236                   | 0.97           | 350          | 19              | 0        | 187 to 296 nM           |
| PTPRG(CA) | PTPRG(CA)<br>CNTN4-Fc | 305                   | 0.98           | 193          | 19              | 0        | 230 to 401 nM           |
| PTPRG(CA) | PTPRG(CA)<br>CNTN5-Fc | 311                   | 0.99           | 802          | 19              | 0        | 257 to 377 nM           |

|                            |                       |      |      |      |    |   |                |
|----------------------------|-----------------------|------|------|------|----|---|----------------|
| PTPRG(CA)                  | PTPRG(CA)<br>CNTN5-Fc | 298  | 0.99 | 1511 | 19 | 0 | 245 to 362 nM  |
| PTPRG(CA)                  | PTPRG(CA)<br>CNTN5-Fc | 395  | 0.98 | 1334 | 18 | 1 | 288 to 541 nM  |
| PTPRG(CA)                  | PTPRG(CA)<br>CNTN5-Fc | 315  | 0.99 | 678  | 19 | 0 | 243 to 409 nM  |
| PTPRG(CA)                  | PTPRG(CA)<br>CNTN5-Fc | 317  | 0.98 | 606  | 18 | 1 | 236 to 426 nM  |
| PTPRG(CA)                  | PTPRG(CA)<br>CNTN6-Fc | 397  | 0.98 | 289  | 19 | 0 | 287 to 550 nM  |
| PTPRG(CA)                  | PTPRG(CA)<br>CNTN6-Fc | 636  | 0.99 | 431  | 17 | 2 | 490 to 824 nM  |
| PTPRG(CA)                  | PTPRG(CA)<br>CNTN6-Fc | 406  | 0.98 | 390  | 17 | 2 | 284 to 579 nM  |
| PTPRG(CA)                  | PTPRG(CA)<br>CNTN6-Fc | 563  | 0.96 | 332  | 17 | 2 | 327 to 967 nM  |
| PTPRG(CA)                  | PTPRG(CA)<br>CNTN6-Fc | 579  | 0.96 | 324  | 17 | 2 | 344 to 975 nM  |
| PTPRG(CA)                  | PTPRG(CA)<br>CNTN6-Fc | 586  | 0.99 | 254  | 18 | 1 | 445 to 771 nM  |
| PTPRG(CA)                  | PTPRG(CA)<br>CNTN6-Fc | 465  | 0.97 | 43   | 17 | 2 | 315 to 686 nM  |
| PTPRG(CA)<br>H295A + V296A | PTPRG(CA)<br>CNTN4-Fc | 761  | 0.99 | 616  | 17 | 2 | 573 to 1010 nM |
| PTPRG(CA)<br>H295A + V296A | PTPRG(CA)<br>CNTN4-Fc | 940  | 0.99 | 378  | 19 | 0 | 724 to 1220 nM |
| PTPRG(CA)<br>H295A + V296A | PTPRG(CA)<br>CNTN4-Fc | 940  | 0.99 | 156  | 19 | 0 | 712 to 1241 nM |
| PTPRG(CA)<br>H295A + V296A | PTPRG(CA)<br>CNTN4-Fc | 1028 | 0.97 | 288  | 19 | 0 | 686 to 1541 nM |

| Inhibitor                  | Immobilized proteins  | IC <sub>50</sub> (nM) | Standard deviation (nM) | n  |
|----------------------------|-----------------------|-----------------------|-------------------------|----|
| PTPRZ(CA)                  | PTPRZ(CA)<br>CNTN1-Fc | 332                   | 15                      | 4  |
| PTPRG(CA)                  | PTPRG(CA)<br>CNTN3-Fc | 428                   | 78                      | 7  |
| PTPRG(CA)                  | PTPRG(CA)<br>CNTN4-Fc | 235                   | 65                      | 10 |
| PTPRG(CA)                  | PTPRG(CA)<br>CNTN5-Fc | 327                   | 39                      | 5  |
| PTPRG(CA)                  | PTPRG(CA)<br>CNTN6-Fc | 519                   | 95                      | 7  |
| PTPRG(CA)<br>H295A + V296A | PTPRG(CA)<br>CNTN4-Fc | 917                   | 112                     | 4  |

**Table S2.** Crystallization and freezing conditions.

| Protein / Protein complexes              | Conc. ( $\mu$ M) | Crystallization condition                                                                           | Freezing solution                                                                                                      |
|------------------------------------------|------------------|-----------------------------------------------------------------------------------------------------|------------------------------------------------------------------------------------------------------------------------|
| Human PTPRG(CA) and mouse CNTN3(Ig2-Ig3) | 50               | 1% (v/v) Tacsimate pH 7.0, 20% (w/v) PEG 3,350, 50mM Imidazole-HCl pH 6.5                           | 1% Tacsimate pH 7.0, 20% PEG (w/v) 3,350, 50mM Imidazole-HCl pH 6.5 and 15% (w/v) PEG 400                              |
| Mouse PTPRG(CA) and mouse CNTN6(Ig2-Ig3) | 100              | 55% (v/v) Tacsimate pH 7.0, 150 mM NDSB 201                                                         | 55% Tacsimate pH 7.0, 150 mM NDSB 201, 20% (v/v) Glycerol                                                              |
| Mouse CNTN5(Ig1-Ig4)                     | 40               | 7% (v/v) Tacsimate pH 7.0, 15% (w/v) PEG 3,350, 50 mM Imidazole pH 7.0                              | 50mM Imidazole pH 7.0, 5% (v/v) Tacsimate pH 7.0, 15% (w/v) PEG 3,350, 20% (v/v) Glycerol                              |
| Chicken CNTN1(FN1-FN3)                   | 260              | 1% (v/v) Tacsimate pH 7.0, 20% (w/v) PEG 3,350, 50mM Imidazole pH 6.5                               | 50 mM Imidazole pH 6.5, 9% (w/v) PEG 3,350, 21% Glycerol                                                               |
| Mouse CNTN2(FN1-FN3)                     | 230              | 50 mM NH <sub>4</sub> Cl, 50 mM Tris-HCl pH 8.5, 10% (w/v) PEG 4,000, 2% (v/v) glycerol             | 50 mM Tris-HCl pH 8.5, 10% (w/v) PEG 4,000, 25% (v/v) glycerol                                                         |
| Mouse CNTN3(FN1-FN3)                     | 200              | 10% (w/v) PEG 1,500, 50 mM Na-cacodylate pH 6.5                                                     | 25% (w/v) PEG 1,500, 50 mM Na-cacodylate pH 6.5, 10% (v/v) glycerol                                                    |
| Mouse CNTN4(FN1-FN3)                     | 180              | 100 mM (NH <sub>4</sub> ) <sub>2</sub> SO <sub>4</sub> , 50 mM Tris-HCl pH 8.5, 10% (w/v) PEG 4,000 | 25 mM (NH <sub>4</sub> ) <sub>2</sub> SO <sub>4</sub> , 50 mM Tris-HCl pH 8.5, 10% (w/v) PEG 4,000, 25% (v/v) glycerol |
| Human CNTN5(FN1-FN3)                     | 270              | 1.0 M NH <sub>4</sub> H <sub>2</sub> PO <sub>4</sub> , 10% (v/v) Tacsimate pH 5.0                   | 1.0 M NH <sub>4</sub> H <sub>2</sub> PO <sub>4</sub> , 10% (v/v) Tacsimate pH 5.5, 38% (w/v) sorbitol                  |
| Mouse CNTN6(FN1-FN3)                     | 25               | 300 mM Na-Malonate pH 7.0, 20% (w/v) PEG 3,350, 50 mM Na-Cacodylate pH 6.5                          | 15% PEG 400, 20% (w/v) PEG 3,350, 250 mM Na-Malonate pH 7.0, 50 mM Na-Cacodylate pH 6.5                                |

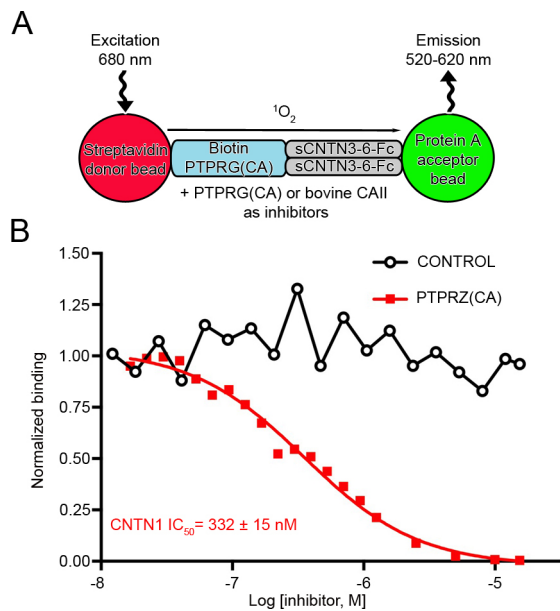

**Figure S1. Interaction between the CA domain of PTPRZ with CNTN1.** (A) In AlphaScreen assays, excitation of donor beads at 680 nm triggers the release of a singlet oxygen. An acceptor bead hit by this highly reactive molecule emits a signal between 520 and 620 nm. Because the half-life of the singlet oxygen is limited, a luminescent signal is only obtained when the donor beads and acceptor beads are within 200 nm. The binding of PTPRZ immobilized on donor beads to Fc fusions of CNTN3-6 bound to acceptor beads brings the two beads in close proximity. Inhibition curves are obtained when increasing concentrations of an inhibitor are added to the reaction. (B) The ability of bovine CAII (control) and human PTPRZ(CA) to inhibit the AlphaScreen signal between an Fc fusion of full length mouse CNTN1 and biotin-labeled PTPRZ(CA) was assessed over a logarithmic dilution series. One representative experiment out of four is shown (Table S1).

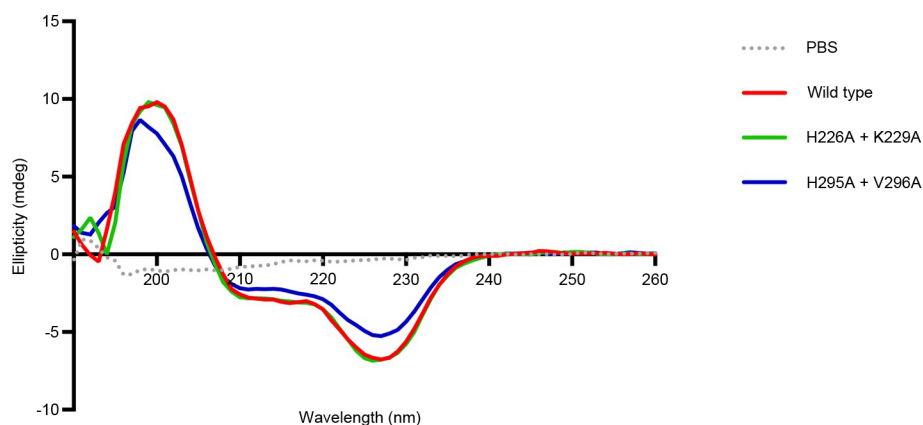

**Figure S2. Circular dichroism analysis of wild type mouse PTPRG(CA) and the site directed mutants H226A + K229A and H295A + V296A.** Purified mouse PTPRG(CA) and the two site-directed mutants were dialyzed extensively against phosphate-buffered saline (PBS, pH 7.4). Spectra were measured at concentrations of 0.2 mg/ml. Comparison of the three spectra indicate that the spectral features of the proteins are overall identical and the differences observed for H295A + V296A are explained by differences in the protein concentration. Overall, these experiments indicate that the mutations do not affect the secondary structure of mouse PTPRG(CA).

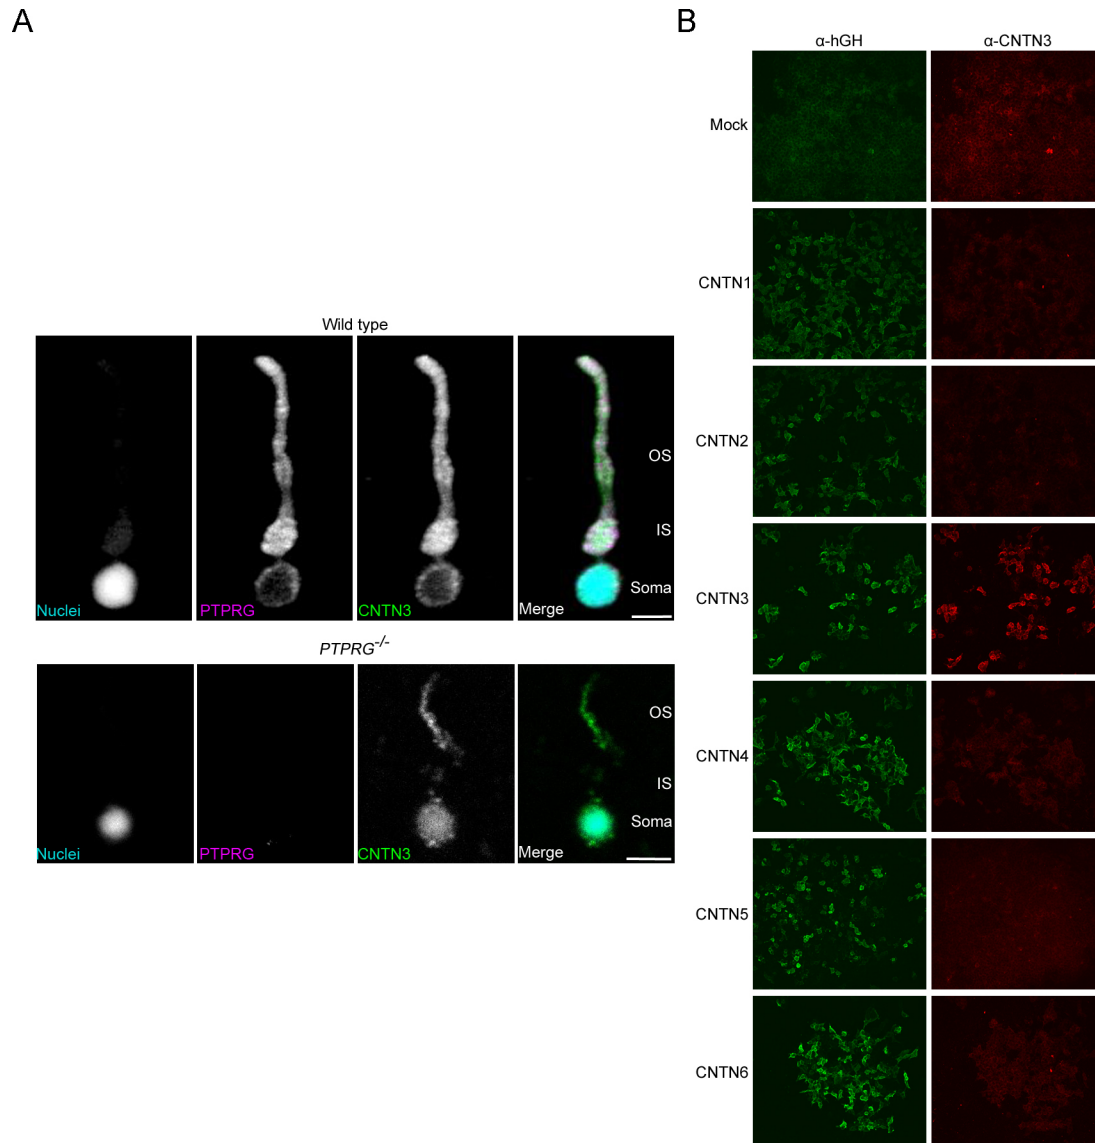

**Figure S3. Validation of the PTPRG and CNTN3 antibodies.** (A) The rabbit anti-PTPRG antibody used for the experiments shown in Fig. 5 stains the outer segment of an isolated mouse rod cell from a wild type mouse, but not the outer segment of a rod cell from a *PTPRG*-null mouse (1). Nuclei (blue) were visualized using RedDot™ 1 staining while PTPRG staining is shown in green. Scale bars are 5  $\mu$ m. (B) Validation of the anti-CNTN3 antibody used for the experiments shown in Fig. 5. HEK293 cells transfected with full-length CNTNs fused to human growth hormone were incubated with a rabbit anti-human growth hormone antibody and with goat anti-CNTN3 antibody. The goat anti-CNTN3 recognized CNTN3 specifically.

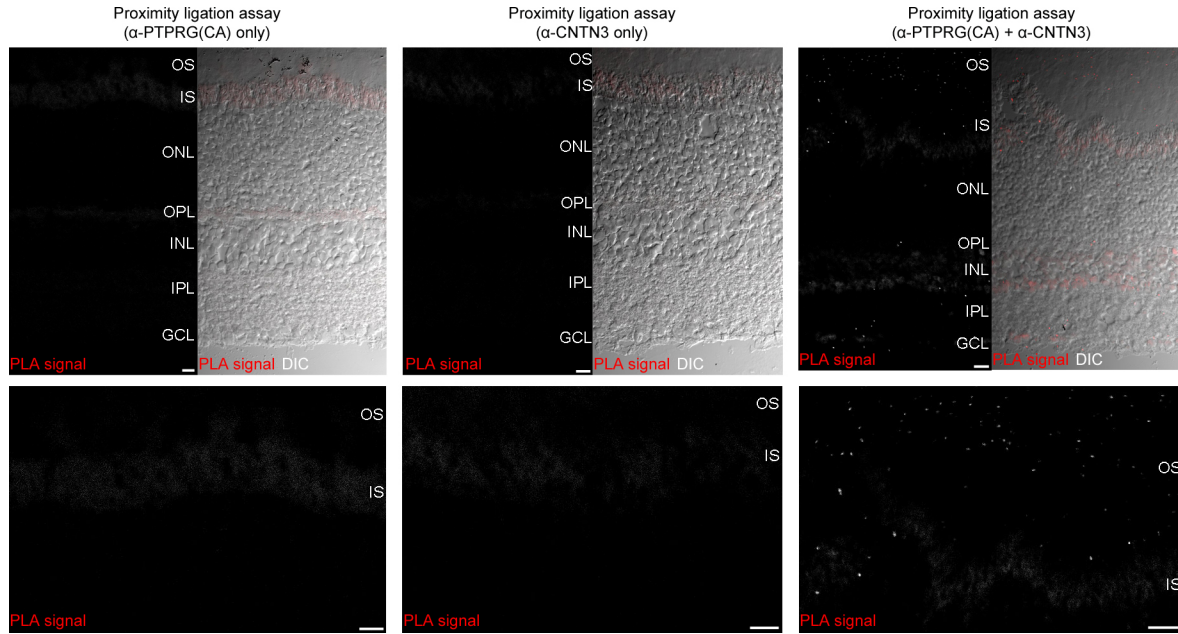

**Figure S4. PTPRG and CNTN3 associate in the outer segments of mouse retinas.** An *in situ* PLA shows that PTPRG and CNTN3 associate in the outer segments. This experiment includes the same goat anti-CNTN3 antibody used for the experiments shown in Fig. 5, whereas PTPRG is detected with a rabbit polyclonal antibody raised against its CA domain. Although the PLA signal is weaker than in the experiments shown in Fig. 4, comparison with the two controls strongly suggests that PTPRG and CNTN3 form a complex in the outer segments of retinas. For each experiment, a panel with PLA signal is shown next to a panel that shows the overall cellular organization of the retina in a differential interference contrast (DIC) image. A zoom of the outer segments is provided below these two panels. Scale bar is 10  $\mu\text{m}$ .

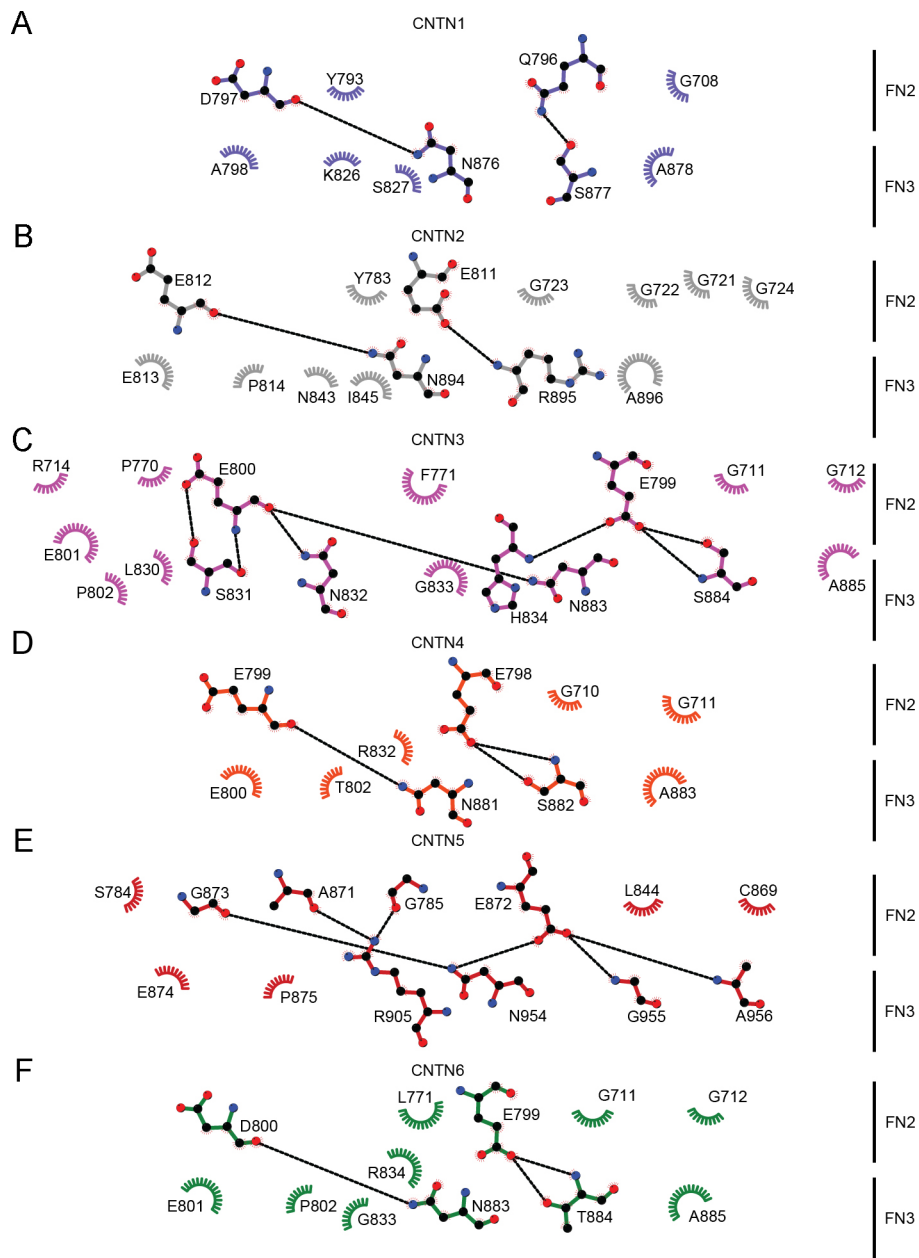

**Figure S5. Conserved and specific interactions at the FN2-FN3 interfaces of CNTNs.** Two-dimensional representations of the contacts at the FN2-FN3 interfaces of CNTNs were drawn using LigPlot<sup>+</sup> (2). Dashed lines indicate potential hydrogen bonds while spine curves indicate residues involved in hydrophobic contacts. Although interactions mediated by the NXA residues found in a loop in FN3 are conserved in all CNTNs, most contacts at the FN2-FN3 interface are unique to each CNTN family member.



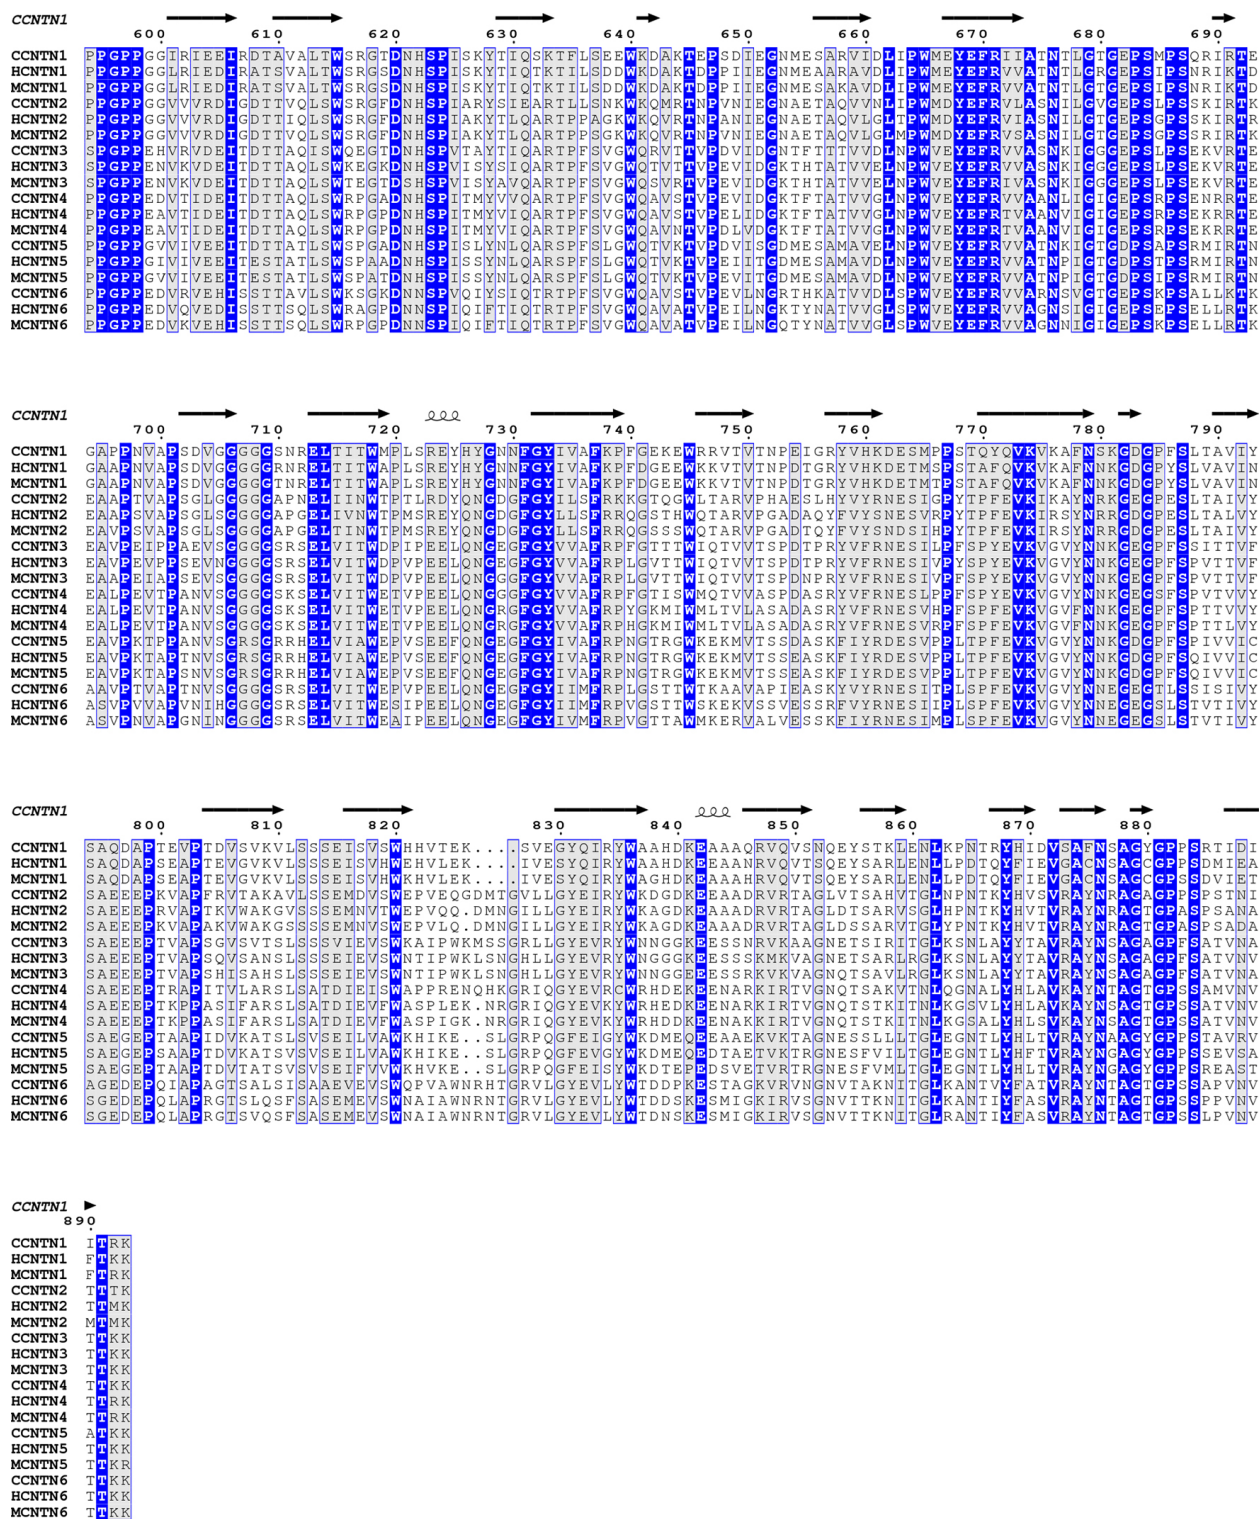

**Figure S6. Alignment of amino acid sequences of domains FN1-FN3 of chicken, human, and mouse CNTN1-6.** The secondary structure of chicken CNTN1 is shown above the sequence and the residue numbering corresponds to chicken CNTN1. Identical residues are shown in blue while similar residues are shaded light gray.

## References

1. Lamprianou, S., Vacaresse, N., Suzuki, Y., Meziane, H., Buxbaum, J. D., Schlessinger, J., and Harroch, S. (2006) Receptor protein tyrosine phosphatase gamma is a marker for pyramidal cells and sensory neurons in the nervous system and is not necessary for normal development. *Mol Cell Biol.* **26**, 5106–5119
2. Laskowski, R. A., and Swindells, M. B. (2011) LigPlot+: Multiple Ligand–Protein Interaction Diagrams for Drug Discovery. *J. Chem. Inf. Model.* **51**, 2778–2786
